# Supplementary material
Source: publisher site journal article supplement (https://static.cambridge.org/content/id/urn:cambridge.org:id:article:S0047279418000818/resource/name/S0047279418000818supp001.docx)
Supplement: Supplementary file 1 [file S0047279418000818supp001.docx]

**Supplementary online material**

**Table A1. Sample Statistics – Mean (%)**

|  | **Full Sample** | **2002-2006** | **2008-2010** | **2012-2015** |
| --- | --- | --- | --- | --- |
| Evaluation: Health Services (11-p. scale: 0 - 10) | 3.97 | 3.46 | 4.42 | 4.23 |
| Evaluation: Education (11-p. scale: 0 - 10) | 4.14 | 3.92 | 4.23 | 4.39 |
| Year of Survey (1 = 2002, 0 = other) | .11 | .26 | - | - |
| Year of Survey (1 = 2004, 0 = other) | .15 | .36 | - | - |
| Year of Survey (1 = 2006, 0 = other) | .16 | .38 | - | - |
| Year of Survey (1 = 2008, 0 = other) | .17 | - | .52 | - |
| Year of Survey (1 = 2010, 0 = other) | .16 | - | .48 | - |
| Year of Survey (1 = 2012, 0 = other) | .16 | - | - | .63 |
| Year of Survey (1 = 2014, 0 = other) | .09 | - | - | .37 |
| Gender (1 = female, 0 = male) | .60 | .60 | .61 | .58 |
| Age Groups (1 = <21, 0 = other) | .04 | .05 | .05 | .05 |
| Age Groups (1 = 21-35, 0 = other) | .20 | .23 | .17 | .18 |
| Age Groups (1 = 36-49, 0 = other) | .21 | .22 | .19 | .21 |
| Age Groups (1 = 50-64, 0 = other) | .24 | .22 | .24 | .25 |
| Age Groups (1 = 65+, 0 = other) | .31 | .28 | .35 | .31 |
| Migration (1 = foreign-born, 0 = inborn) | .06 | .06 | .06 | .07 |
| Subj. Health (1 = very good, 0 = other) | .10 | .07 | .11 | .13 |
| Subj. Health (1 = good, 0 = other) | .40 | .40 | .40 | .40 |
| Subj. Health (1 = fair, 0 = other) | .36 | .38 | .35 | .34 |
| Subj. Health (1 = bad, 0 = other) | .12 | .12 | .12 | .11 |
| Subj. Health (1 = very bad, 0 = other) | .02 | .03 | .02 | .02 |
| Health Limitations (1= yes, 0 = no) | .20 | .19 | .20 | .21 |
| Employment Status (1 = in paid work, 0 = other) | .57 | .46 | .40 | .39 |
| Employment Status (1 = in education, 0 = other) | .06 | .07 | .06 | .06 |
| Employment Status (1 = unemployed, 0 = other) | .08 | .05 | .08 | .12 |
| Employment Status (1 = retired, 0 = other) | .31 | .27 | .36 | .31 |
| Employment Status (1 = disabled/long-term sick, 0 = other) | .01 | .02 | .01 | .02 |
| Employment Status (1 = other empl. status, 0 = other) | .11 | .13 | .09 | .10 |
| Subj. HH-Income (1 = living comfortably, 0 = other) | .07 | .08 | .07 | .07 |
| Subj. HH-Income (1 = coping, 0 = other) | .49 | .52 | .48 | .47 |
| Subj. HH-Income (1 = difficult, 0 = other) | .31 | .28 | .31 | .34 |
| Subj. HH-Income (1 = very difficult, 0 = other) | .13 | .12 | .14 | .12 |
| Education (1 = low, 0 = other) | .73 | .74 | .74 | .68 |
| Education (1 = medium, 0 = other) | .16 | .15 | .15 | .19 |
| Education (1 = high, 0 = other) | .11 | .11 | .11 | .13 |
| Partner ling in HH (1 = yes, 0 = no) | .59 | .61 | .59 | .55 |
| HH Size (1-7 persons living in HH) | 2.57 | 2.67 | 2.53 | 2.48 |
| Kids in HH (1 = yes, 0 = no) | .36 | .39 | .34 | .34 |

Note: ESS, Portuguese Sample, rounds 1-7, sample includes all respondents participating in the ESS in Portugal with valid information on all individual level variables

**Table A2. Determinants of Healthcare Evaluations – Results of Linear Regression Models, separate for years**

|  | **2002** | | **2004** | | **2006** | | **2008** | | **2010** | | **2012** | | **2014** | |
| --- | --- | --- | --- | --- | --- | --- | --- | --- | --- | --- | --- | --- | --- | --- |
|  | **β** | **SE** | **β** | **SE** | **β** | **SE** | **β** | **SE** | **β** | **SE** | **β** | **SE** | **β** | **SE** |
| **Socio-Demographic Characteristics** |  |  |  |  |  |  |  |  |  |  |  |  |  |  |
| **Female** (0 = male) | -0.22 | (0.17) | 0.15 | (0.12) | -0.20+ | (0.12) | -0.17 | (0.11) | 0.03 | (0.12) | 0.05 | (0.13) | -0.23 | (0.17) |
| **Age Groups** (0 = 36-49) |  |  |  |  |  |  |  |  |  |  |  |  |  |  |
| <21 | 0.82 | (0.52) | 0.33 | (0.34) | 0.74+ | (0.42) | 0.13 | (0.33) | 0.15 | (0.39) | 0.01 | (0.34) | -0.37 | (0.53) |
| 21-35 | 0.25 | (0.22) | 0.10 | (0.18) | 0.38+ | (0.20) | 0.08 | (0.17) | 0.21 | (0.20) | 0.09 | (0.19) | 0.04 | (0.29) |
| 50-64 | -0.16 | (0.24) | -0.04 | (0.20) | -0.17 | (0.18) | 0.30 | (0.18) | 0.11 | (0.21) | 0.40* | (0.20) | 0.15 | (0.25) |
| 65+ | 0.43 | (0.33) | 0.03 | (0.27) | 0.38 | (0.23) | 0.43+ | (0.24) | 0.52+ | (0.28) | 0.73** | (0.27) | 0.11 | (0.41) |
| **Foreign Born** (0 = inborn) | 0.21 | (0.35) | 0.51* | (0.22) | 0.75** | (0.26) | 0.80** | (0.27) | 1.14*** | (0.24) | 0.86*** | (0.22) | 0.42 | (0.33) |
| **Subj. Health** (0 = v. good) |  |  |  |  |  |  |  |  |  |  |  |  |  |  |
| good | 0.24 | (0.31) | 0.29 | (0.19) | -0.05 | (0.25) | -0.12 | (0.20) | -0.12 | (0.21) | -0.10 | (0.18) | -0.62* | (0.31) |
| fair | 0.23 | (0.33) | 0.31 | (0.22) | -0.16 | (0.27) | -0.37 | (0.22) | 0.22 | (0.24) | -0.18 | (0.22) | -1.06** | (0.34) |
| bad | -0.49 | (0.43) | 0.25 | (0.31) | -0.50 | (0.33) | -0.62* | (0.30) | -0.02 | (0.31) | -0.85** | (0.28) | -2.28*** | (0.49) |
| v. bad | -1.48* | (0.58) | -0.18 | (0.71) | -1.21** | (0.42) | -0.86+ | (0.48) | -0.84 | (0.59) | -1.23** | (0.45) | -2.92*** | (0.66) |
| **Health Limitations** (0 = no limitations) | 0.02 | (0.30) | 0.11 | (0.21) | -0.01 | (0.20) | 0.20 | (0.18) | -0.00 | (0.19) | 0.72*** | (0.18) | 0.28 | (0.26) |
| **Socio-Economic Characteristics** |  |  |  |  |  |  |  |  |  |  |  |  |  |  |
| **Employment Status** (0 = in paid work) |  |  |  |  |  |  |  |  |  |  |  |  |  |  |
| In education | -0.08 | (0.45) | 0.44 | (0.27) | 0.32 | (0.30) | 0.49+ | (0.28) | 0.84** | (0.30) | 0.48 | (0.30) | 1.15** | (0.39) |
| Unemployed | 0.17 | (0.45) | -0.01 | (0.23) | 0.42+ | (0.25) | 0.23 | (0.21) | 0.14 | (0.24) | -0.03 | (0.19) | 0.35 | (0.29) |
| Retired | 0.05 | (0.27) | 0.14 | (0.24) | 0.16 | (0.20) | 0.15 | (0.21) | 0.12 | (0.23) | -0.53* | (0.22) | 0.69+ | (0.38) |
| Disabled/long-term sick | 0.98 | (0.78) | 0.25 | (0.56) | 0.29 | (0.49) | 0.92+ | (0.48) | 0.15 | (0.67) | 0.47 | (0.82) | -0.32 | (0.60) |
| Others | 0.10 | (0.26) | 0.15 | (0.20) | 0.49* | (0.20) | 0.23 | (0.22) | 0.19 | (0.27) | -0.42+ | (0.24) | 1.16** | (0.36) |
| **Subj. HH-Income** (0 = living comfortably) |  |  |  |  |  |  |  |  |  |  |  |  |  |  |
| coping | -0.43 | (0.29) | -0.68** | (0.23) | -0.05 | (0.21) | -0.09 | (0.23) | -0.33 | (0.20) | -0.12 | (0.33) | -0.23 | (0.26) |
| difficult | -0.43 | (0.32) | -0.71** | (0.26) | -0.09 | (0.24) | -0.44+ | (0.25) | -0.68** | (0.23) | -0.67* | (0.34) | -0.40 | (0.31) |
| very difficult | -0.67+ | (0.39) | -0.72* | (0.33) | -0.48+ | (0.27) | -0.64* | (0.29) | -0.89** | (0.30) | -0.96* | (0.37) | -0.37 | (0.37) |
| **Education** (0 = low education) |  |  |  |  |  |  |  |  |  |  |  |  |  |  |
| medium | -0.50* | (0.22) | -0.20 | (0.17) | -0.18 | (0.16) | -0.30+ | (0.16) | -0.15 | (0.18) | -0.08 | (0.18) | -0.23 | (0.25) |
| high | 0.12 | (0.29) | 0.21 | (0.20) | 0.05 | (0.20) | -0.20 | (0.18) | 0.04 | (0.19) | 0.32 | (0.21) | -0.26 | (0.24) |
| **HH-Characteristics** |  |  |  |  |  |  |  |  |  |  |  |  |  |  |
| **Partner** (0 = no partner in HH) | -0.06 | (0.18) | 0.05 | (0.14) | -0.08 | (0.13) | -0.28* | (0.12) | -0.00 | (0.14) | 0.16 | (0.13) | 0.22 | (0.21) |
| **HH Size** (0 = 1-person HH) | 0.01 | (0.09) | 0.03 | (0.06) | 0.02 | (0.06) | 0.12+ | (0.07) | 0.12+ | (0.07) | 0.24*** | (0.07) | -0.04 | (0.09) |
| **Kids in HH** (0 = no kids) | -0.25 | (0.19) | 0.16 | (0.16) | 0.04 | (0.15) | -0.08 | (0.15) | -0.09 | (0.16) | -0.42* | (0.17) | 0.06 | (0.25) |
| **Constant** | 3.65*** | (0.50) | 3.46*** | (0.38) | 3.65*** | (0.41) | 4.38*** | (0.35) | 4.33*** | (0.35) | 3.69*** | (0.42) | 5.39*** | (0.50) |
| **R2** | 0.06 |  | 0.03 |  | 0.05 |  | 0.05 |  | 0.06 |  | 0.08 |  | 0.07 |  |
| **N** | 1458 |  | 1972 |  | 2095 |  | 2295 |  | 2100 |  | 2113 |  | 1238 |  |

Note: ESS, Portuguese Sample, rounds 1-7, unstandardized coefficients, standard errors in parentheses, standard weights applied, + *p* < 0.10, * *p* < 0.05, ** *p* < 0.01, *** *p* < 0.001

**Table A3. Robustness Check – Determinants of Evaluation of Educational System (2002-2015)**

|  | **(1)**  **2002-2015** | | **(2)**  **2002-2006** | | **(3)**  **2008-2010** | | **(4)**  **2012-2015** | |
| --- | --- | --- | --- | --- | --- | --- | --- | --- |
|  | **β** | **SE** | **β** | **SE** | **β** | **SE** | **β** | **SE** |
| **Year of Survey (0 = 2008)** |  |  |  |  |  |  |  |  |
| 2002 | -0.31*** | (0.09) | -0.57*** | (0.09) |  |  |  |  |
| 2004 | -0.15+ | (0.08) | -0.40*** | (0.08) |  |  |  |  |
| 2006 | 0.26*** | (0.07) | Ref. |  |  |  |  |  |
| 2008 | Ref. |  |  |  | Ref. |  |  |  |
| 2010 | 0.65*** | (0.08) |  |  | 0.64*** | (0.08) |  |  |
| 2012 | 0.57*** | (0.08) |  |  |  |  | Ref. |  |
| 2015 | 0.44*** | (0.09) |  |  |  |  | -0.10 | (0.10) |
| **Socio-Demographic Characteristics** |  |  |  |  |  |  |  |  |
| **Female** (0 = male) | 0.00 | (0.05) | 0.01 | (0.07) | 0.04 | (0.08) | -0.11 | (0.10) |
| **Age Groups** (0 = 36-49) |  |  |  |  |  |  |  |  |
| <21 | 0.46** | (0.15) | 0.53* | (0.22) | 0.42 | (0.26) | 0.21 | (0.29) |
| 21-35 | 0.37*** | (0.07) | 0.33** | (0.11) | 0.50*** | (0.12) | 0.29+ | (0.15) |
| 50-64 | -0.03 | (0.07) | -0.05 | (0.11) | -0.11 | (0.13) | 0.10 | (0.15) |
| 65+ | 0.08 | (0.09) | 0.11 | (0.14) | -0.06 | (0.17) | 0.12 | (0.21) |
| **Foreign Born** (0 = inborn) | 0.72*** | (0.11) | 0.30+ | (0.17) | 1.20*** | (0.19) | 0.74*** | (0.22) |
| **Subj. Health** (0 = v. good) |  |  |  |  |  |  |  |  |
| good | -0.02 | (0.08) | 0.07 | (0.14) | 0.09 | (0.15) | -0.21 | (0.14) |
| fair | -0.05 | (0.09) | 0.07 | (0.15) | 0.19 | (0.17) | -0.42* | (0.17) |
| bad | -0.17 | (0.12) | -0.15 | (0.19) | 0.26 | (0.20) | -0.65** | (0.24) |
| v. bad | -0.81*** | (0.18) | -0.64* | (0.28) | -0.44 | (0.29) | -1.40*** | (0.41) |
| **Health Limitations** (0 = no limitations) | 0.08 | (0.07) | 0.05 | (0.11) | 0.06 | (0.11) | 0.21 | (0.15) |
| **Socio-Economic Characteristics** |  |  |  |  |  |  |  |  |
| **Employment Status** (0 = in paid work) |  |  |  |  |  |  |  |  |
| In education | -0.08 | (0.12) | -0.34+ | (0.18) | 0.11 | (0.22) | 0.38 | (0.25) |
| Unemployed | 0.05 | (0.09) | 0.01 | (0.15) | 0.08 | (0.15) | 0.12 | (0.16) |
| Retired | -0.00 | (0.08) | -0.09 | (0.12) | 0.17 | (0.14) | -0.10 | (0.18) |
| Disabled/long-term sick | -0.11 | (0.20) | 0.41 | (0.27) | -0.29 | (0.24) | -0.58 | (0.44) |
| Others | 0.05 | (0.08) | 0.02 | (0.12) | 0.07 | (0.16) | 0.05 | (0.18) |
| **Subj. HH-Income** (0 = living comfortably) |  |  |  |  |  |  |  |  |
| coping | -0.05 | (0.10) | -0.02 | (0.14) | -0.07 | (0.17) | -0.09 | (0.20) |
| difficult | -0.21* | (0.10) | -0.02 | (0.16) | -0.34+ | (0.18) | -0.42* | (0.21) |
| very difficult | -0.44*** | (0.12) | -0.10 | (0.18) | -0.63** | (0.21) | -0.80** | (0.25) |
| **Education** (0 = low education) |  |  |  |  |  |  |  |  |
| medium | -0.31*** | (0.07) | -0.27** | (0.10) | -0.31** | (0.11) | -0.39** | (0.14) |
| high | -0.37*** | (0.08) | -0.25* | (0.12) | -0.48*** | (0.13) | -0.49** | (0.15) |
| **HH-Characteristics** |  |  |  |  |  |  |  |  |
| **Partner** (0 = no partner in HH) | 0.11* | (0.05) | 0.11 | (0.08) | 0.09 | (0.09) | 0.08 | (0.11) |
| **HH Size** (0 = 1-person HH) | 0.05* | (0.02) | 0.05 | (0.04) | 0.03 | (0.04) | 0.07 | (0.05) |
| **Kids in HH** (0 = no kids) | -0.05 | (0.06) | -0.02 | (0.09) | -0.06 | (0.10) | -0.06 | (0.13) |
| **Constant** | 3.85*** | (0.16) | 3.97*** | (0.24) | 3.76*** | (0.25) | 4.81*** | (0.28) |
| **R2** | 0.05 |  | 0.03 |  | 0.07 |  | 0.05 |  |
| **N** | 12653 |  | 5278 |  | 4142 |  | 3233 |  |

Note: ESS, Portuguese Sample, rounds 1-7, unstandardized coefficients, standard errors in parentheses, standard weights applied, + *p* < 0.10,  * *p* < 0.05, ** *p* < 0.01, *** *p* < 0.001
